# Supplementary material for: Do the associations of body mass index and waist circumference with back pain change as people age? 32 years of follow-up in a British birth cohort
Source: PubMed Central journal article supplement (PMC7735102; doi:10.1136/bmjopen-2020-039197), 2020-12-12
Supplement: bmjopen-2020-039197supp001.pdf [file bmjopen-2020-039197supp001.pdf]

**Supplementary information: Do the associations of body mass index and waist circumference with back pain change as people age? 32 years of follow-up in a British birth cohort**

Stella G Muthuri, Rachel Cooper, Diana Kuh & Rebecca Hardy

**Supplementary methods:****Questions used to assess back pain in the MRC National Survey of Health and Development*****Ages 36 and 43 years [nurse interviews]:***

Do you have any of the following (sciatica, lumbago or recurring backache) all or most of the time?

0 No

1 Yes

***Ages 53 and 60-64 years [nurse interviews]:***

In the last 12 months, have you had sciatica, lumbago or severe backache?

0 No

1 Yes

***Age 68 years [self-completion questionnaire]:***

In the *last month*, have you had any ache or pain which has lasted for *one day or longer*? (Please do not include pain occurring only during the course of a feverish illness such as flu)

0 No

1 Yes

Below you will find four diagrams of the body.

Please **shade** in all the places where you have felt or feel the aches and pains.

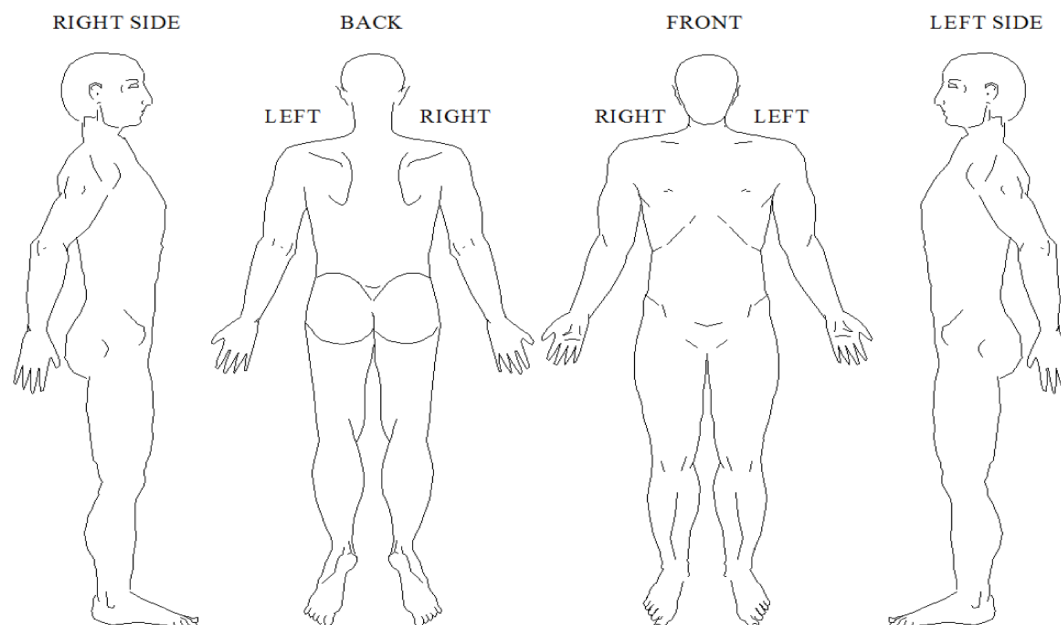

**Table S1: Number of MRC National Survey of Health and Development participants contributing data at each age and number with missing data<sup>a</sup>**

| Age    | Total N contributing data at specified age (no. of males; no. of females) | N with data on back pain but missing data on BMI/WC at specified age | N with data on back pain and BMI/WC at specified age but missing data on covariates |
|--------|---------------------------------------------------------------------------|----------------------------------------------------------------------|-------------------------------------------------------------------------------------|
| 36y    | 3093 (1540; 1553)                                                         | 48                                                                   | 175                                                                                 |
| 43y    | 2940 (1483; 1457)                                                         | 52                                                                   | 259                                                                                 |
| 53y    | 2700 (1332; 1368)                                                         | 44                                                                   | 243                                                                                 |
| 60-64y | 1816 (872; 944)                                                           | 29                                                                   | 390                                                                                 |
| 68-69y | 1777 (860; 917)                                                           | 485                                                                  | 158                                                                                 |

<sup>a</sup> A total of 3426 MRC NSHD participants were included in the main analyses. Participant's data could be included at a specified age if there was complete information on back pain, BMI, waist circumference and all covariates at that age

BMI: Body mass index; WC: waist circumference

**Table S2: Characteristics of the MRC National Survey of Health and Development sample included in analysis <sup>a</sup>**

|                                                           | Male        | Female      |
|-----------------------------------------------------------|-------------|-------------|
| <b>Highest education level achieved by age 26y, N (%)</b> |             |             |
| A-level/equivalent or above                               | 706 (41.0)  | 463 (27.2)  |
| O-level/equivalent or below                               | 357 (20.7)  | 587 (34.5)  |
| None                                                      | 660 (38.3)  | 653 (38.3)  |
| <b>Own occupational class at age 53y, N (%)</b>           |             |             |
| High (I/II)                                               | 853 (49.5)  | 593 (34.8)  |
| Middle (IIINM/IIIM)                                       | 662 (38.4)  | 740 (43.5)  |
| Low (IV/V)                                                | 208 (12.1)  | 370 (21.7)  |
| <b>Time varying covariates<sup>b</sup></b>                |             |             |
| <b>Height (cm), mean (SD), at age:</b>                    |             |             |
| 36y                                                       | 175.4 (6.5) | 162.4 (6.0) |
| 43y                                                       | 175.2 (6.6) | 162.4 (6.2) |
| 53y                                                       | 174.7 (6.5) | 161.6 (5.9) |
| 60-64y                                                    | 174.8 (6.5) | 161.9 (5.9) |
| 69y                                                       | 174.0 (6.4) | 160.7 (5.9) |
| <b>Smoking status, N (%), at age:</b>                     |             |             |
| 36y                                                       |             |             |
| Current                                                   | 530 (34.4)  | 524 (33.7)  |
| Ex                                                        | 617 (40.1)  | 518 (33.4)  |
| Never                                                     | 393 (25.5)  | 511 (32.9)  |
| 43y                                                       |             |             |
| Current                                                   | 460 (31.0)  | 417 (28.6)  |
| Ex                                                        | 522 (35.2)  | 373 (25.6)  |
| Never                                                     | 501 (33.8)  | 667 (45.8)  |
| 53y                                                       |             |             |
| Current                                                   | 323 (24.3)  | 315 (23.0)  |
| Ex                                                        | 544 (40.8)  | 391 (28.6)  |
| Never                                                     | 465 (34.9)  | 662 (48.4)  |
| 60-64y                                                    |             |             |
| Current                                                   | 97 (11.1)   | 105 (11.1)  |
| Ex                                                        | 410 (47.0)  | 322 (34.1)  |
| Never                                                     | 365 (41.9)  | 517 (54.8)  |
| 68-69y                                                    |             |             |
| Current                                                   | 76 (8.8)    | 65 (7.1)    |
| Ex                                                        | 411 (47.8)  | 314 (34.2)  |
| Never                                                     | 373 (43.4)  | 538 (58.7)  |
| <b>Leisure time physical activity, N (%), at age:</b>     |             |             |
| 36y                                                       |             |             |
| Inactive                                                  | 475 (30.8)  | 651 (41.9)  |
| Less active                                               | 407 (26.4)  | 376 (24.2)  |
| Most active                                               | 658 (42.7)  | 526 (33.9)  |
| 43y                                                       |             |             |

|        |             |            |            |
|--------|-------------|------------|------------|
|        | Inactive    | 714 (48.2) | 805 (55.3) |
|        | Less active | 354 (23.9) | 338 (23.2) |
|        | Most active | 415 (28.0) | 314 (21.6) |
| 53y    |             |            |            |
|        | Inactive    | 627 (47.1) | 689 (50.4) |
|        | Less active | 252 (18.9) | 227 (16.6) |
|        | Most active | 453 (34.0) | 452 (33.0) |
| 60-64y |             |            |            |
|        | Inactive    | 557 (63.9) | 585 (62.0) |
|        | Less active | 118 (13.5) | 142 (15.0) |
|        | Most active | 197 (22.6) | 217 (23.0) |
| 68-69y |             |            |            |
|        | Inactive    | 491 (57.1) | 520 (56.7) |
|        | Less active | 101 (11.7) | 141 (15.4) |
|        | Most active | 268 (31.2) | 256 (27.9) |

**Symptoms of anxiety and depression, N(%), at age:**

|        |     |             |             |
|--------|-----|-------------|-------------|
| 36y    | No  | 1482 (96.2) | 1420 (91.4) |
|        | Yes | 58 (3.8)    | 133 (8.6)   |
| 43y    |     |             |             |
|        | No  | 1350 (91.0) | 1233 (84.6) |
|        | Yes | 133 (9.0)   | 224 (15.4)  |
| 53y    |     |             |             |
|        | No  | 1147 (86.1) | 1035 (75.7) |
|        | Yes | 185 (13.9)  | 333 (24.3)  |
| 60-64y |     |             |             |
|        | No  | 765 (87.7)  | 739 (78.3)  |
|        | Yes | 107 (12.3)  | 205 (21.7)  |
| 69y    |     |             |             |
|        | No  | 781 (90.8)  | 764 (83.3)  |
|        | Yes | 79 (9.2)    | 153 (16.7)  |

SD: Standard Deviation; y: years

<sup>a</sup> Maximum N=3426 (this includes participants with a valid measure of back pain, BMI, waist circumference and each covariate for at least one age)

<sup>b</sup> See number of participants with valid data at specified age in Supplementary Table S1

**Table S3: Coefficients from the multilevel models for standardised BMI and waist circumference with back pain across adulthood (N=3426)**

|               | <b>BMI</b>           |                |                            |                |
|---------------|----------------------|----------------|----------------------------|----------------|
|               | <b>Model 1</b>       |                | <b>Model 2<sup>a</sup></b> |                |
|               | <b>Log-odds (SE)</b> | <b>P value</b> | <b>Log-odds (SE)</b>       | <b>P value</b> |
| BMI (per SD)  | 0.119 (0.071)        | 0.03           | 0.112 (0.056)              | 0.05           |
| Sex (female)  | 0.221 (0.072)        | 0.002          | 0.500 (0.102)              | <0.001         |
| Age 43        | 0.683 (0.073)        | <0.001         | 0.674 (0.074)              | <0.001         |
| Age 53        | 1.008 (0.074)        | <0.001         | 0.993 (0.076)              | <0.001         |
| Age 60-64     | 0.869 (0.083)        | <0.001         | 0.895 (0.087)              | <0.001         |
| Age 68        | 0.786 (0.084)        | <0.001         | 0.876 (0.088)              | <0.001         |
| Age 43*BMI    | -0.019 (0.071)       | 0.8            | -0.009 (0.071)             | 0.9            |
| Age 53*BMI    | 0.037 (0.072)        | 0.5            | 0.045 (0.072)              | 0.5            |
| Age 60-64*BMI | 0.148 (0.082)        | 0.07           | 0.148 (0.081)              | 0.07           |
| Age 68*BMI    | -0.040 (0.084)       | 0.6            | -0.046 (0.084)             | 0.6            |

  

|              | <b>Waist circumference</b> |                |                            |                |
|--------------|----------------------------|----------------|----------------------------|----------------|
|              | <b>Model 1</b>             |                | <b>Model 2<sup>a</sup></b> |                |
|              | <b>Log-odds (SE)</b>       | <b>P value</b> | <b>Log-odds (SE)</b>       | <b>P value</b> |
| WC (per SD)  | 0.160 (0.057)              | 0.005          | 0.129 (0.057)              | 0.02           |
| Sex (female) | 0.221 (0.071)              | 0.002          | 0.442 (0.102)              | <0.001         |
| Age 43       | 0.684 (0.073)              | <0.001         | 0.674 (0.074)              | <0.001         |
| Age 53       | 1.010 (0.074)              | <0.001         | 0.990 (0.076)              | <0.001         |
| Age 60-64    | 0.875 (0.083)              | <0.001         | 0.896 (0.087)              | <0.001         |
| Age 68       | 0.787 (0.084)              | <0.001         | 0.867 (0.088)              | <0.001         |
| Age 43*WC    | -0.048 (0.072)             | 0.5            | -0.049 (0.072)             | 0.5            |
| Age 53*WC    | -0.011 (0.073)             | 0.9            | -0.009 (0.073)             | 0.9            |
| Age 60-64*WC | 0.076 (0.083)              | 0.4            | 0.063 (0.083)              | 0.5            |
| Age 68*WC    | -0.050 (0.084)             | 0.6            | -0.058 (0.084)             | 0.5            |

Note. BMI: body mass index; WC: waist circumference; SE: standard error; SD: Standard Deviation

As BMI and WC are standardised and so have a mean of 0 and SD of 1, the main effects of age represent the estimate at the mean BMI

<sup>a</sup> Model 2: model 1 + education, occupational class and time-varying covariates (height, cigarette smoking status, physical activity and symptoms of anxiety and depression)

**Table S4: Associations between body composition measures<sup>a</sup> at age 60-64 and back pain at age 68 (n=1186)**

| Sex-standardised body composition measures | Model 1 <sup>b</sup>  |         | Model 2 <sup>c</sup>  |         |
|--------------------------------------------|-----------------------|---------|-----------------------|---------|
|                                            | Odds ratio<br>(95%CI) | P value | Odds ratio<br>(95%CI) | P value |
| Lean mass index                            | 0.93 (0.79, 1.10)     | 0.4     | 0.91 (0.77, 1.08)     | 0.3     |
| Fat mass index                             | 1.23 (1.04, 1.45)     | 0.01    | 1.24 (1.04, 1.47)     | 0.02    |

<sup>a</sup>Assessment of body composition measures has been described in detail by Bann et al[1]

<sup>b</sup> Model 1: includes sex, lean mass index and fat mass index

<sup>c</sup> Model 2: model 1 + education at age 26, occupational class at age 53 and the following covariates (assessed at age 60-64): height, cigarette smoking status, physical activity and symptoms of anxiety and depression

**Table S5: Odds Ratios (OR) of back pain at each age per 1 kg/m<sup>2</sup> increases in BMI and 1 cm increases in waist circumference at the same age estimated from multilevel logistic models (12 326 observations nested within 3426 individuals)**

| BMI                           |                      |         |                      |         |
|-------------------------------|----------------------|---------|----------------------|---------|
|                               | Model 1 <sup>a</sup> |         | Model 2 <sup>b</sup> |         |
| Per kg/m <sup>2</sup> BMI at: | OR (95% CI)          | P value | OR (95% CI)          | P value |
| 36y                           | 1.03 (1.00,1.07)     | 0.04    | 1.03 (1.00,1.06)     | 0.05    |
| 43y                           | 1.02 (1.00,1.05)     | 0.06    | 1.03 (1.00,1.05)     | 0.05    |
| 53y                           | 1.04 (1.01,1.06)     | 0.002   | 1.04 (1.01,1.06)     | 0.002   |
| 60-64y                        | 1.06 (1.03,1.08)     | <0.001  | 1.05 (1.03,1.08)     | <0.001  |
| 68y                           | 1.02 (0.99,1.04)     | 0.2     | 1.02 (0.99,1.04)     | 0.2     |
| Waist circumference           |                      |         |                      |         |
|                               | Model 1 <sup>a</sup> |         | Model 2 <sup>b</sup> |         |
| Per cm WC at:                 | OR (95% CI)          | P value | OR (95% CI)          | P value |
| 36y                           | 1.014 (1.004,1.023)  | 0.005   | 1.011 (1.001,1.020)  | 0.03    |
| 43y                           | 1.011 (1.002,1.020)  | 0.01    | 1.008 (0.999,1.017)  | 0.07    |
| 53y                           | 1.013 (1.005,1.021)  | 0.002   | 1.011 (1.002,1.019)  | 0.01    |
| 60-64y                        | 1.019 (1.009,1.030)  | <0.001  | 1.016 (1.006,1.026)  | 0.002   |
| 68y                           | 1.009 (0.999,1.019)  | 0.07    | 1.006 (0.996,1.015)  | 0.3     |

*Note.* BMI: body mass index; OR: Odds Ratio; y: years

<sup>a</sup> Model 1: Includes age as a categorical variable, BMI or WC and an age by BMI or age by WC interaction (as appropriate), adjusted for sex (as there was no evidence of a sex by BMI ( $p=0.5$ ) or sex by WC ( $p=0.7$ ) interaction)

<sup>b</sup> Model 2: Includes age as a categorical variable, BMI or WC and an age by BMI or age by WC interaction (as appropriate), adjusted for sex, education, occupational class and time-varying covariates (height, cigarette smoking status, physical activity and symptoms of anxiety and depression)



**Table S6: Odds Ratios (OR) of back pain at each age per 1 kg/m<sup>2</sup> increase in BMI and 1 cm increase in waist circumference at the previous age estimated from multilevel logistic models (8 595 observations nested within 3044 individuals)**

|                                   |                   | BMI                  |         |                      |         |
|-----------------------------------|-------------------|----------------------|---------|----------------------|---------|
|                                   |                   | Model 1 <sup>a</sup> |         | Model 2 <sup>b</sup> |         |
| Per kg/m <sup>2</sup> BMI at age: | Back pain at age: | OR (95% CI)          | P value | OR (95% CI)          | P value |
| 36y                               | 43y               | 1.02 (0.99, 1.05)    | 0.1     | 1.02 (0.99, 1.05)    | 0.2     |
|                                   | 43y               | 1.04 (1.02, 1.07)    | 0.002   | 1.04 (1.02, 1.07)    | 0.004   |
|                                   | 60-64y            | 1.06 (1.03, 1.09)    | <0.001  | 1.05 (1.02, 1.08)    | <0.001  |
| 60-64y                            | 68y               | 1.02 (0.99, 1.05)    | 0.2     | 1.02 (0.99, 1.05)    | 0.3     |
|                                   |                   | Waist circumference  |         |                      |         |
|                                   |                   | Model 1 <sup>a</sup> |         | Model 2 <sup>b</sup> |         |
| Per cm WC at age:                 | Back pain at age: | OR (95% CI)          | P value | OR (95% CI)          | P value |
| 36y                               | 43y               | 1.012 (1.002,1.021)  | 0.01    | 1.009 (0.999, 1.018) | 0.07    |
|                                   | 53y               | 1.015 (1.006, 1.025) | 0.001   | 1.013 (1.004, 1.022) | 0.005   |
|                                   | 60-64y            | 1.019 (1.009, 1.030) | <0.001  | 1.016 (1.005, 1.026) | 0.003   |
| 60-64y                            | 68y               | 1.007 (0.996, 1.019) | 0.2     | 1.004 (0.993, 1.015) | 0.5     |

*Note.* BMI: body mass index; SD: Standard Deviation; OR: Odds Ratio; y: years

<sup>a</sup> Model 1: Includes age as a categorical variable, BMI or WC and an age by BMI or age by WC interaction (as appropriate), adjusted for sex (as there was no evidence of a sex by BMI (p=0.7) or sex by WC (p=0.9) interaction)

<sup>b</sup> Model 2: Includes age as a categorical variable, BMI or WC and an age by BMI or age by WC interaction (as appropriate), adjusted for sex, education, occupational class and time-varying covariates (height, cigarette smoking status, physical activity and symptoms of anxiety and depression)

## References

1. Bann D, Kuh D, Wills AK, et al. Physical activity across adulthood in relation to fat and lean body mass in early old age: Findings from the Medical Research Council National Survey of Health and Development, 1946–2010. *Am J Epidemiol.* 2014;179:1197-207.
